# Supplementary material for: MHC class I allele diversity in cynomolgus macaques of Vietnamese origin
Source: PeerJ journal article supplement (doi:10.7717/peerj.7941), 2019-11-04
Supplement: Figure_S1.pdf [file Figure_S1.pdf]

**Figure S1**

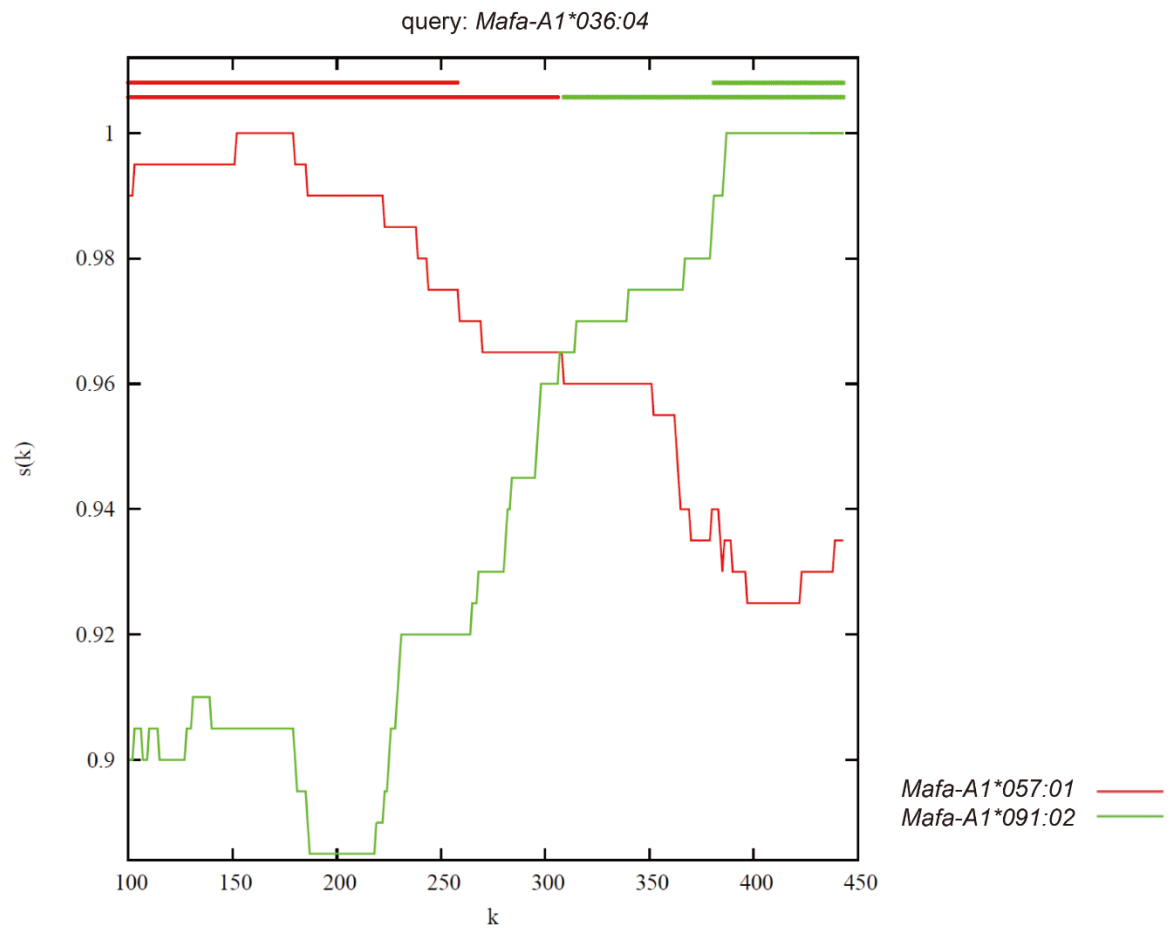

**Figure S1.** Schematic presentation of a putative crossover event between *Mafa-A1\*091:02* and *Mafa-A1\*057:01*, by which *Mafa-A1\*036:04* was generated.
